# Supplementary material for: Molecular Dynamics of "Fuzzy" Transcriptional Activator-Coactivator Interactions
Source: PubMed Central journal article supplement (PMC4866707; doi:10.1371/journal.pcbi.1004935), 2016-05-13
Supplement: pcbi.1004935.s001.pdf [file pcbi.1004935.s001.pdf]

|                          |                                                                                                                                                                                                                                                                                                                    |
|--------------------------|--------------------------------------------------------------------------------------------------------------------------------------------------------------------------------------------------------------------------------------------------------------------------------------------------------------------|
| <i>S. cerevisiae</i>     | -----N-SKE- <b>W</b> <b>T</b> <b>S</b> <b>L</b> <b>F</b> <b>D</b> <b>N</b> <b>D</b> <b>I</b> <b>P</b> <b>V</b> -TTDD <b>V</b> SLADKAIESTEEVSLV-                                                                                                                                                                    |
| <i>S. kudriavzevii</i>   | -----N-SKE- <b>W</b> <b>T</b> <b>S</b> <b>L</b> <b>F</b> <b>D</b> <b>N</b> <b>D</b> <b>I</b> <b>P</b> <b>V</b> -TTDD <b>V</b> SLADKAIESTEEASLV-                                                                                                                                                                    |
| <i>T. phaffii</i>        | -----N-PKN- <b>W</b> <b>T</b> <b>P</b> <b>L</b> <b>F</b> <b>D</b> <b>N</b> <b>D</b> <b>I</b> <b>A</b> <b>V</b> -TAED <b>V</b> NSASTAIESIADSQES-                                                                                                                                                                    |
| <i>V. polyspora</i>      | -----N-KSSE <b>W</b> <b>T</b> <b>S</b> <b>L</b> <b>F</b> <b>D</b> <b>N</b> <b>D</b> <b>I</b> <b>P</b> <b>V</b> -TTDD <b>V</b> NSAIDAIELVVEEQAIN-                                                                                                                                                                   |
| <i>K. naganishii</i>     | -----QNPEK <b>Q</b> <b>W</b> <b>T</b> <b>S</b> <b>L</b> <b>F</b> <b>D</b> <b>N</b> <b>D</b> <b>I</b> <b>P</b> <b>V</b> -VTEED-----VMFTDKAVVET-                                                                                                                                                                     |
| <i>L. thermotolerans</i> | -----D--PQG <b>W</b> <b>N</b> <b>S</b> <b>L</b> <b>F</b> <b>D</b> <b>D</b> <b>I</b> <b>A</b> <b>V</b> -SVSDETIAPSVFSGSDAISEG-                                                                                                                                                                                      |
| <i>N. castellii</i>      | -----SNDPK <b>N</b> <b>W</b> <b>T</b> <b>S</b> <b>L</b> <b>F</b> <b>E</b> <b>N</b> <b>D</b> <b>L</b> <b>P</b> <b>I</b> <b>I</b> <b>T</b> <b>E</b> <b>D</b> <b>D</b> <b>V</b> SLNDKAIELTHDVAVN-                                                                                                                     |
| <i>N. dairenensis</i>    | -----DNDPK <b>Q</b> <b>W</b> <b>T</b> <b>S</b> <b>L</b> <b>F</b> <b>D</b> <b>N</b> <b>D</b> <b>I</b> <b>P</b> <b>I</b> <b>I</b> <b>T</b> <b>E</b> <b>E</b> <b>D</b> <b>V</b> VLTKAVELTHDQVSS-                                                                                                                      |
| <i>K. africana</i>       | -----SSDP <b>N</b> <b>T</b> <b>W</b> <b>T</b> <b>S</b> <b>L</b> <b>F</b> <b>D</b> <b>D</b> <b>I</b> <b>P</b> <b>V</b> <b>V</b> <b>T</b> <b>E</b> <b>E</b> <b>D</b> <b>V</b> TNNDDAIKITDDVAQV-                                                                                                                      |
| <i>C. glabrata</i>       | -----SSDNPEN <b>W</b> <b>T</b> <b>S</b> <b>L</b> <b>F</b> <b>D</b> <b>D</b> <b>V</b> <b>E</b> <b>I</b> -KVED <b>V</b> FGADAAGASITQFEQQ-                                                                                                                                                                            |
| <i>K. lactis</i>         | -----GGVET <b>W</b> <b>T</b> <b>S</b> <b>L</b> <b>F</b> <b>D</b> <b>N</b> <b>D</b> <b>I</b> <b>P</b> <b>V</b> -TLED <b>V</b> SDCANAVTLELESTHNV                                                                                                                                                                     |
| <i>K. marxianus</i>      | -----GGVET <b>W</b> <b>T</b> <b>S</b> <b>L</b> <b>F</b> <b>D</b> <b>N</b> <b>D</b> <b>I</b> <b>P</b> <b>V</b> -TLDD <b>V</b> SASANAATLELELESNA                                                                                                                                                                     |
| <i>T. blattae</i>        | KDASSSDPIANSASHE <b>W</b> <b>T</b> <b>S</b> <b>L</b> <b>F</b> <b>D</b> <b>N</b> <b>D</b> <b>I</b> <b>P</b> <b>V</b> -SSAD <b>V</b> DLASKAIELIEQDPQFI                                                                                                                                                               |
| <i>A. gossypii</i>       | -----ADPK <b>T</b> <b>W</b> <b>S</b> <b>S</b> <b>L</b> <b>F</b> <b>D</b> <b>D</b> <b>I</b> <b>P</b> <b>V</b> -TLED <b>V</b> GAVEPISAAAAGTE--S-                                                                                                                                                                     |
| <i>A. aceri</i>          | -----TDPK <b>T</b> <b>W</b> <b>S</b> <b>S</b> <b>L</b> <b>F</b> <b>D</b> <b>D</b> <b>I</b> <b>P</b> <b>V</b> -TLED <b>V</b> SSVESITTAAGTE--S-                                                                                                                                                                      |
| <i>E. cymbalariae</i>    | -----SNHKE <b>W</b> <b>S</b> <b>S</b> <b>L</b> <b>F</b> <b>D</b> <b>D</b> <b>I</b> <b>P</b> <b>V</b> -TIED <b>V</b> AEAQSVMTSVEVDMNT-                                                                                                                                                                              |
| <i>W. ciferrii</i>       | -----DSEN <b>W</b> <b>N</b> <b>S</b> <b>L</b> <b>F</b> <b>E</b> <b>P</b> <b>N</b> <b>E</b> <b>L</b> <b>E</b> <b>I</b> --KQEETTPPEPKQVSSHLIDE-                                                                                                                                                                      |
| <i>C. fabianii</i>       | -----DSSN <b>W</b> <b>T</b> <b>S</b> <b>L</b> <b>F</b> <b>E</b> <b>P</b> <b>S</b> <b>E</b> <b>M</b> <b>E</b> <b>I</b> <b>P</b> <b>V</b> <b>K</b> <b>E</b> <b>E</b> <b>K</b> <b>P</b> <b>A</b> <b>P</b> <b>I</b> <b>P</b> <b>A</b> <b>P</b> <b>V</b> <b>A</b> <b>T</b> <b>A</b> <b>T</b> <b>A</b> <b>S</b> <b>A</b> |
| <i>K. pastoris</i>       | -----DPNN <b>W</b> <b>V</b> <b>S</b> <b>L</b> <b>F</b> <b>A</b> <b>D</b> -----ETTLATTPAVSRAPAASA-                                                                                                                                                                                                                  |
| <i>Z. bailii</i>         | -----ASGA <b>W</b> <b>P</b> <b>A</b> <b>L</b> -EPLFGE---DEERVAVEDIEEALKQVAS-                                                                                                                                                                                                                                       |
| <i>T. delbrueckii</i>    | -----SGEESK <b>W</b> <b>G</b> <b>S</b> <b>L</b> <b>F</b> <b>D</b> <b>D</b> <b>E</b> <b>I</b> <b>P</b> <b>I</b> <b>N</b> <b>P</b> <b>A</b> <b>D</b> <b>V</b> <b>F</b> <b>N</b> <b>F</b> <b>T</b> <b>P</b> <b>Q</b> <b>A</b> <b>E</b> <b>E</b> <b>E</b> <b>V</b> <b>V</b> <b>V</b> <b>P</b> <b>S</b>                 |
| <i>M. farinosa</i>       | -----KSVSKED <b>W</b> <b>V</b> <b>S</b> <b>L</b> <b>F</b> <b>G</b> <b>E</b> <b>T</b> <b>D</b> <b>G</b> <b>A</b> <b>D</b> <b>A</b> <b>F</b> <b>A</b> <b>K</b> <b>Q</b> <b>P</b> <b>F</b> <b>I</b> <b>P</b> <b>T</b> <b>D</b> <b>F</b> <b>E</b> <b>K</b> <b>S</b> <b>S</b> <b>R</b> <b>K</b> ----                    |
| <i>C. lusitaniae</i>     | -----KVNSKDD <b>W</b> <b>V</b> <b>S</b> <b>L</b> <b>F</b> <b>K</b> <b>D</b> <b>E</b> <b>P</b> <b>I</b> <b>P</b> <b>E</b> <b>H</b> <b>A</b> <b>A</b> <b>S</b> <b>A</b> <b>P</b> <b>S</b> <b>V</b> <b>P</b> <b>E</b> <b>Q</b> <b>D</b> <b>L</b> <b>H</b> <b>N</b> <b>L</b> ----                                      |
| <i>M. guilliermondii</i> | -----KVNSDD <b>W</b> <b>V</b> <b>A</b> <b>L</b> <b>F</b> <b>G</b> <b>D</b> <b>E</b> <b>S</b> <b>E</b> <b>T</b> <b>S</b> <b>V</b> <b>P</b> <b>E</b> <b>S</b> <b>S</b> <b>L</b> <b>V</b> <b>T</b> <b>H</b> <b>E</b> <b>D</b> <b>I</b> <b>N</b> <b>S</b> <b>E</b> <b>L</b> ----                                       |
| <i>D. hansenii</i>       | -----KASSKDD <b>W</b> <b>V</b> <b>S</b> <b>L</b> <b>F</b> <b>G</b> <b>G</b> <b>N</b> <b>D</b> <b>D</b> <b>S</b> <b>G</b> <b>K</b> <b>R</b> <b>E</b> <b>E</b> <b>T</b> <b>N</b> <b>V</b> <b>S</b> <b>M</b> <b>N</b> <b>A</b> <b>P</b> <b>T</b> <b>K</b> <b>R</b> <b>S</b> <b>Y</b> ----                             |
| <i>S. stipitis</i>       | -----KVNSKDD <b>W</b> <b>V</b> <b>S</b> <b>L</b> <b>F</b> <b>G</b> <b>P</b> <b>A</b> <b>A</b> <b>D</b> S---DAQIISLDADIEDSLV----                                                                                                                                                                                    |
| <i>C. tenuis</i>         | -----SNKED <b>W</b> <b>V</b> <b>S</b> <b>L</b> <b>F</b> <b>D</b> <b>A</b> <b>N</b> <b>N</b> <b>E</b> <b>I</b> <b>D</b> <b>N</b> <b>S</b> <b>F</b> <b>N</b> <b>F</b> <b>T</b> <b>K</b> <b>V</b> <b>S</b> <b>D</b> <b>E</b> <b>D</b> <b>L</b> <b>S</b> <b>I</b> ----                                                 |
| <i>K. capsulata</i>      | -----PDADS <b>W</b> <b>E</b> <b>S</b> <b>L</b> <b>F</b> <b>G</b> <b>T</b> <b>E</b> <b>H</b> <b>L</b> <b>E</b> <b>P</b> <b>G</b> <b>P</b> <b>V</b> <b>E</b> <b>V</b> <b>D</b> <b>E</b> <b>K</b> <b>P</b> <b>E</b> <b>I</b> <b>V</b> <b>T</b> <b>E</b> <b>I</b> <b>K</b> <b>H</b> ----                               |
| <i>O. parapolymorpha</i> | -----DSS <b>W</b> <b>E</b> <b>P</b> <b>L</b> <b>F</b> <b>K</b> <b>E</b> <b>D</b> -DLIQLAVESTPAIKEEILP----                                                                                                                                                                                                          |

# S1 Fig

## Scholes & Weinzierl
